# Supplementary material for: Nanometer-sized nickel and cobalt doped forsterite synthesis for investigating critical element recovery from mafic and ultramafic rocks
Source: Royal Society of Chemistry journal article supplement (doi:10.1039/d4qi02586e), 2025-01-01
Supplement: d4qi02586e1.pdf [file d4qi02586e1.pdf]

## Electronic Supporting Information

### Nanometer-Sized Nickel and Cobalt Doped Forsterite Synthesis for Investigating Critical Element Recovery from Mafic and Ultramafic Rocks

Kelly A. Peterson<sup>a,\*</sup>, Mark E. Bowden<sup>a</sup>, Bavan P. Rajan<sup>a</sup>, Tenley E. Webb<sup>a</sup>, Bridgette N. Carven<sup>a</sup>, Libor Kovarik<sup>a</sup>, Zsombor Molnár<sup>a</sup>, Mark H. Engelhard<sup>b</sup>, Sandra D. Taylor<sup>a</sup>, Elsa A. Cordova<sup>b</sup>, Thomas W. Wietsma<sup>c</sup>, Sebastian T. Mergelsberg<sup>a</sup>, Christopher J. Thompson<sup>b</sup>, Sebastien N. Kerisit<sup>a</sup>, and John S. Loring<sup>a,\*</sup>

<sup>a</sup> *Physical and Computational Sciences Directorate, Pacific Northwest National Laboratory, Richland, WA 99352, United States*

<sup>b</sup> *Energy and Environment Directorate, Pacific Northwest National Laboratory, Richland, WA 99352, United States*

<sup>c</sup> *Earth and Biological Sciences Directorate, Pacific Northwest National Laboratory, Richland, WA 99352, United States*

\*Corresponding Authors: [kelly.peterson@pnnl.gov](mailto:kelly.peterson@pnnl.gov) and [john.loring@pnnl.gov](mailto:john.loring@pnnl.gov)

**This file contains 7 Pages, 5 Figures, and 1 Table.**

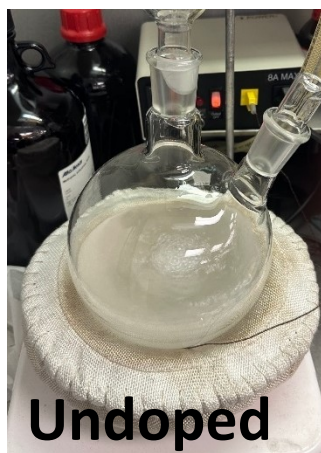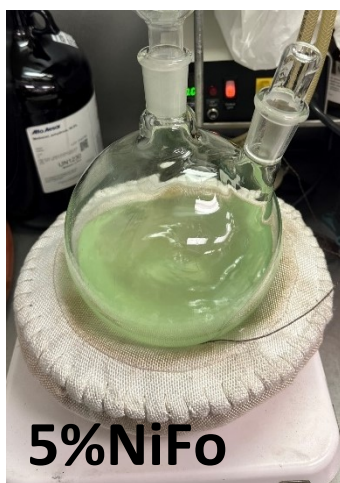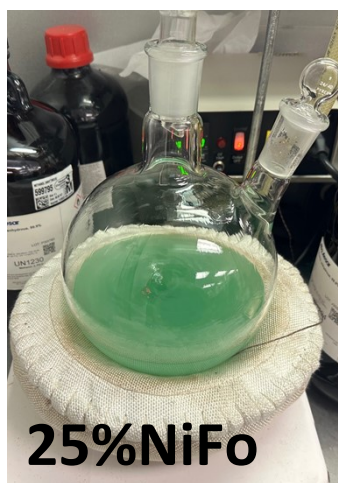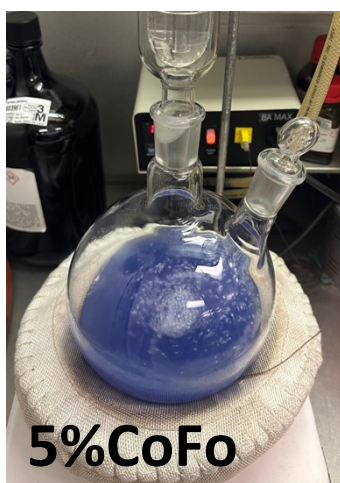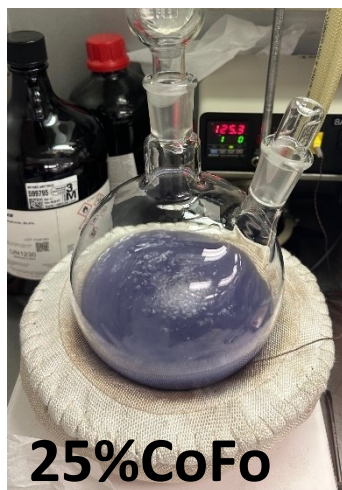

**Figure S1.** Pictures showing the reflux step for each of the undoped and metal doped forsterites after water additions.

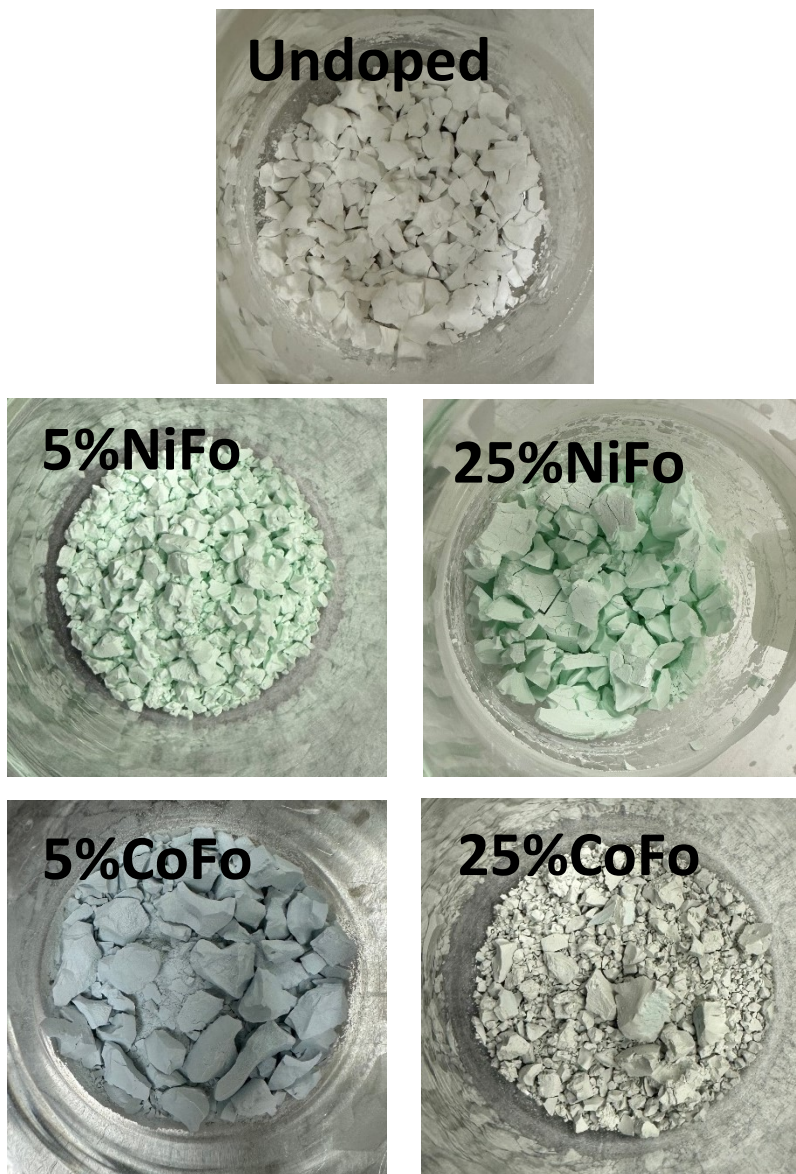

**Figure S2.** Pictures showing the dried gel after the washing step of the synthesis of undoped and metal doped forsterites.

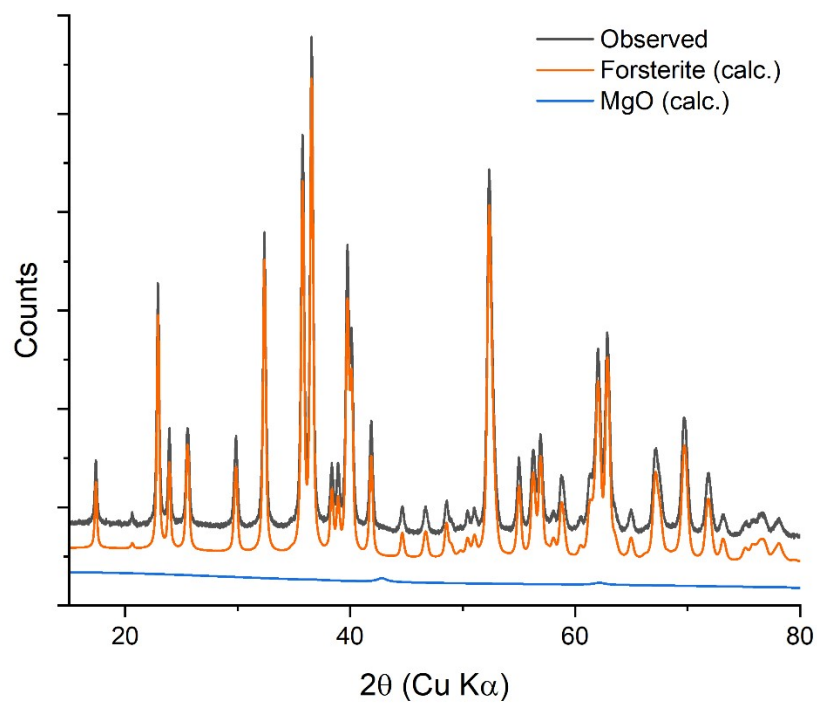

**Figure S3.** Experimental X-Ray diffraction pattern of undoped forsterite (black trace) shown with Rietveld refinement calculations of forsterite (orange trace) and MgO (blue trace) contributions.

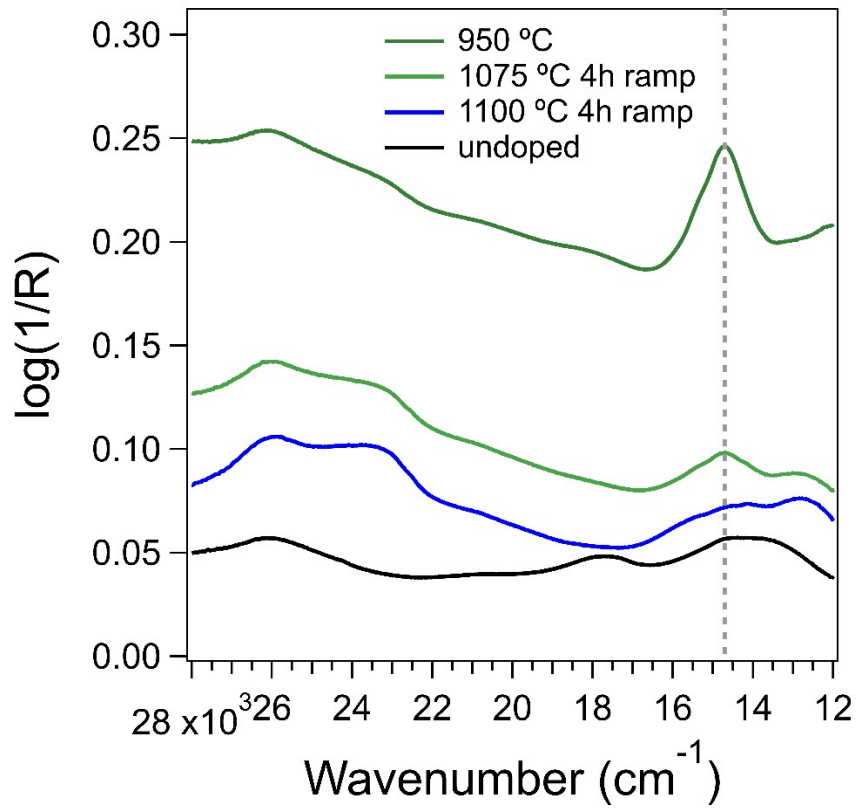

**Figure S4.** UV-Vis absorbance spectra of 5% Ni-doped forsterites synthesized under different calcination conditions. Absorbance band at  $14,700 \text{ cm}^{-1}$  (marked with gray dashed line) was assigned to (Mg,Ni)O secondary phase.

**Table S1.** Mid-IR and far IR peak locations in wavenumber ( $\text{cm}^{-1}$ ) of undoped and doped forsterite FTIR-ATR spectra. Peaks assigned based on assignments by Hofmeister and Pitman (*Phys. Chem. Miner.*, 2007).

| Assignment    | undoped  | 5%CoFo   | 5%NiFo   | 25%CoFo  | 25%NiFo  |
|---------------|----------|----------|----------|----------|----------|
|               | 1103.364 | 1102.239 | 1106.351 |          |          |
|               | 1005.193 | 1001.749 | 1002.509 | 1003.453 | 1004.626 |
| $\nu_3(3)$    | 987.072  | 983.32   | 986.867  | 973.281  | 979.803  |
| $\nu_3(2)$    |          | 956.132  | 956.433  |          |          |
| $\nu_3(1)$    | 871.848  | 870.062  | 874.602  | 870.668  | 873.465  |
| $\nu_1$       | 840.278  | 838.567  | 842.274  | 838.195  | 840.448  |
| $\nu_4(3)$    | 613.672  | 611.732  | 613.855  | 604.505  | 603.128  |
|               |          | 547.11   | 547.691  |          |          |
| $\nu_4(2)$    | 524.564  | 524.155  | 524.45   | 520.22   | 521.491  |
| $\nu_4(3)$    | 504.343  | 501.582  | 504.756  | 492.806  | 496.032  |
| $\nu_2(3)$    | 471.011  | 468.073  | 471.418  | 457.024  | 462.014  |
| LO or $\nu_2$ | 415.511  | 413.61   | 414.638  |          |          |
| R             | 396.887  | 394.042  | 397.326  | 400.094  | 405.104  |
| M(7)          | 381.463  | 379.651  | 381.711  |          | 381.332  |
| M(6)          | 353.526  | 347.219  | 354.124  | 339.634  | 345.091  |
| M(4)          | 319.645  |          |          |          |          |
| M(5)          |          |          |          | 295.779  | 304.181  |
| M(3)+LO       | 287.41   | 281.844  | 286.816  |          |          |
| M(1)          | 271.624  | 272.555  | 272.196  | 263.69   | 267.526  |
| T(2)          | 200.996  | 197.094  | 200.469  |          |          |
| T(1)          | 142.125  | 137.87   | 139.228  | 128.935  | 131.301  |

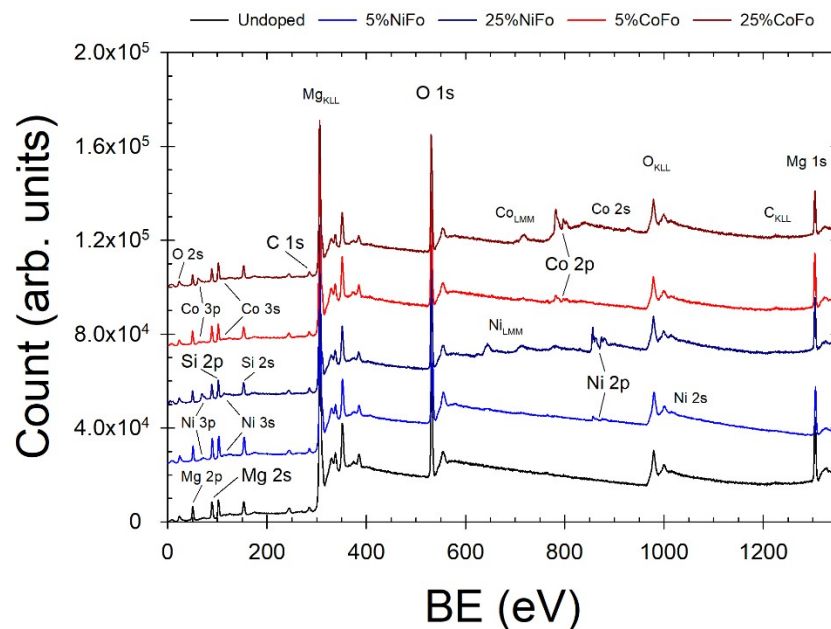

**Figure S5.** XPS spectra (survey scans) of undoped, 5% Ni-doped, 25% Ni-doped, 5% Co-doped, and 25% Co-doped forsterites. C, O, Mg, Si, Ni, and Co photoelectron lines are labeled. Larger font size is used to indicate the photoelectron lines used in the regional scans.
